# Supplementary material
Source: Springer Nature journal article supplement (https://www.springermedizin.de/resource/supplementary/12889_2013_6674_MOESM3_ESM.pdf/9498580)

Figure 1: The prevalence of obesity and overweight in relation to age

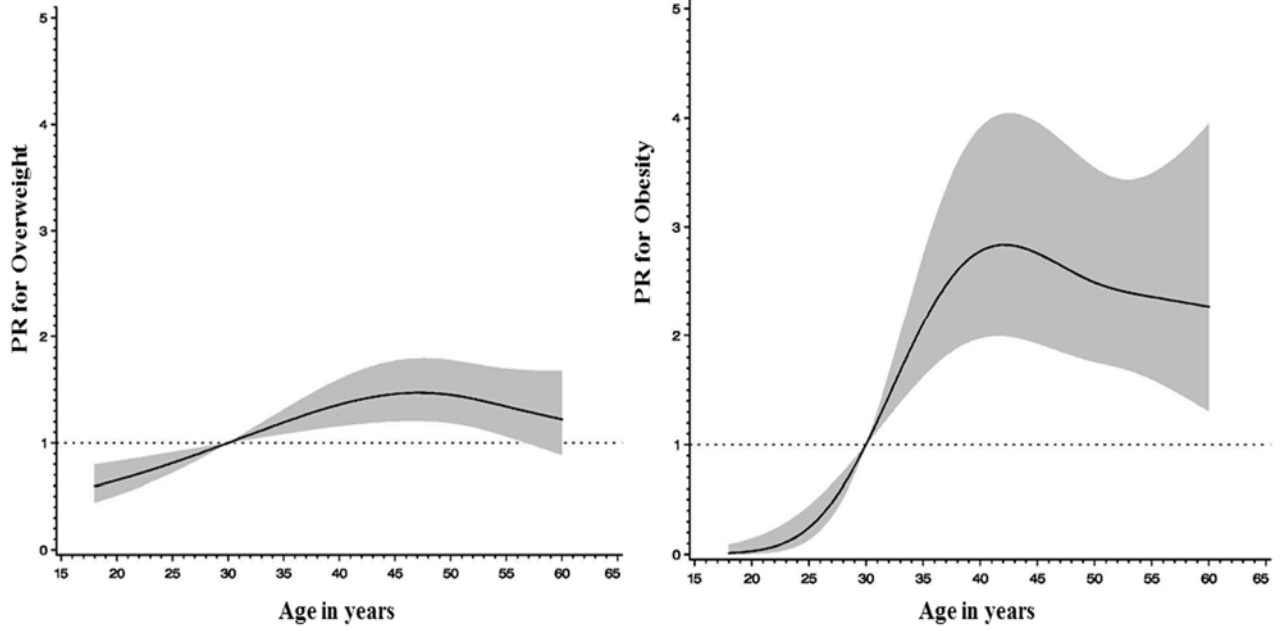

Supplement: MOESM3 [file 9498580]
